# Supplementary material for: Extrachromosomal circular DNAs are common and functional in esophageal squamous cell carcinoma
Source: PubMed Central journal article supplement — Ann Transl Med. 2021 Sep;9(18):1464. doi: 10.21037/atm-21-4372 (PMC8506789; doi:10.21037/atm-21-4372), 2021-09
Supplement: atm-09-18-1464-supplementary.pdf [file atm-09-18-1464-supplementary.pdf]

**Table S1** The primers of candidate eccDNAs

| Candidate eccDNAs             | Forward primer                | Reverse primer                  | Product size |
|-------------------------------|-------------------------------|---------------------------------|--------------|
| O1 (chr3:153320590-153321556) | 5'-ACTCTGGCTGGTAGGACCAA-3'    | 5'-GATTGGGCAAAGAGGTGGGA-3'      | 256 bp       |
| O2 (chr14:65484268-65484970)  | 5'-GGGCCTTTCATTGGAAGCAATC-3'  | 5'-TGACATTGCCCCAGAAGCG-3'       | 679 bp       |
| O3 (chr1:201630725-201631049) | 5'-GAGTGCTGCATCTAGCGGAG-3'    | 5'-TGGGAGCTGGGGAGTCTAAT-3'      | 153 bp       |
| O4 (chr5:167233287-167234692) | 5'-AAAAGCCTGGCCTCCATTGT-3'    | 5'-GCTGGGGGCCATCTTCATTA-3'      | 677 bp       |
| O5 (chr3:137490587-137491130) | 5'-GTAAGCAGGATCCACCCGAG-3'    | 5'-CTCGCGTCTATGCGGGTATT-3'      | 278 bp       |
| S1 (chr8:38223231-38223598)   | 5'-CGTTCACCTGTTCAGAGGCTT-3'   | 5'-CCAGCCTCTCTATATGACTGATTCC-3' | 320 bp       |
| S2 (chr1:68141078-68144108)   | 5'-TGGCCACATCTAAGACCAG-3'     | 5'-GGTCCGTCTTACTGCTGTG-3'       | 300 bp       |
| S3 (chr10:70277601-70277938)  | 5'-ACGGAGAGCTATAATTGTGCGG-3'  | 5'-CCTCCAGCCTTAGTCTCTGAGT-3'    | 312 bp       |
| S4 (chr14:31640553-31641482)  | 5'-AGTTCCAAAAGCAGAGGCC-3'     | 5'-CCATGCCATCTCCATCCACT-3'      | 657 bp       |
| S5 (chr13:41890332-41891079)  | 5'-GCAAGATGATTCTGTGCAACCCA-3' | 5'-ATGGAGCAACTTCTCACAGCATC-3'   | 659 bp       |

Ox or Sx indicates the up-regulated or down-regulated candidate eccDNAs in ESCC relative to matched normal epithelium. In the form of ChrX: Y-Z, X indicates chromosome id, Y indicates start site and Z indicates end site. EccDNA, extrachromosomal circular DNA.

**Table S2** The summary of reads and eccDNA count in each sample

| Reads or count | C1          | C2          | C3          | N1          | N2          | N3          |
|----------------|-------------|-------------|-------------|-------------|-------------|-------------|
| Raw reads      | 141,510,152 | 138,644,094 | 148,054,446 | 136,927,808 | 137,162,048 | 142,572,110 |
| Clean reads    | 141,495,966 | 138,630,264 | 148,034,092 | 136,914,164 | 137,144,340 | 142,555,544 |
| EccDNA count   | 91,030      | 103,663     | 40,755      | 52,896      | 71,261      | 60,837      |

Cx indicated ESCC, while Nx indicated matched normal epithelium. EccDNA, extrachromosomal circular DNA; ESCC, esophageal squamous cell carcinoma.

**Table S3** The genes giving rise to more than 100 eccDNAs

| Gene            | Number of eccDNAs generated by the gene |
|-----------------|-----------------------------------------|
| <i>LSAMP</i>    | 192                                     |
| <i>CSMD1</i>    | 159                                     |
| <i>MACROD2</i>  | 149                                     |
| <i>MAGI2</i>    | 142                                     |
| <i>CNTNAP2</i>  | 138                                     |
| <i>RBFOX1</i>   | 129                                     |
| <i>WWOX</i>     | 125                                     |
| <i>NRXN3</i>    | 121                                     |
| <i>LPP</i>      | 116                                     |
| <i>NAALADL2</i> | 114                                     |
| <i>DAB1</i>     | 108                                     |
| <i>AUTS2</i>    | 106                                     |
| <i>LRP1B</i>    | 106                                     |
| <i>SHANK2</i>   | 104                                     |
| <i>PTPRD</i>    | 103                                     |
| <i>IMMP2L</i>   | 101                                     |

EccDNA, extrachromosomal circular DNA.

**Table S4** The genes generating the most candidate eccDNAs at differential level (top 10)

| Up-regulated eccDNAs in ESCC |                                        | Down-regulated eccDNAs in ESCC |                                        |
|------------------------------|----------------------------------------|--------------------------------|----------------------------------------|
| Gene                         | Count of eccDNAs generated by the gene | Gene                           | Count of eccDNAs generated by the gene |
| <i>AUTS2</i>                 | 13                                     | <i>LSAMP</i>                   | 7                                      |
| <i>SHANK2</i>                | 11                                     | <i>CSMD1</i>                   | 7                                      |
| <i>MACROD2</i>               | 11                                     | <i>BICD1</i>                   | 7                                      |
| <i>ASIC2</i>                 | 10                                     | <i>KALRN</i>                   | 6                                      |
| <i>LPP</i>                   | 10                                     | <i>ROBO2</i>                   | 6                                      |
| <i>EYS</i>                   | 10                                     | <i>FHOD3</i>                   | 5                                      |
| <i>MAGI2</i>                 | 9                                      | <i>GRID2</i>                   | 5                                      |
| <i>MYO3B</i>                 | 9                                      | <i>DOCK3</i>                   | 5                                      |
| <i>TENM4</i>                 | 9                                      | <i>MACROD2</i>                 | 5                                      |
| <i>DMD</i>                   | 9                                      | <i>RUNX1</i>                   | 5                                      |

EccDNA, extrachromosomal circular DNA; ESCC, esophageal squamous cell carcinoma.

**Table S5** The nucleotide pattern flanking the eccDNAs junctional sites

| Location | Start position |                |                |                 | End position    |                |                |                 |
|----------|----------------|----------------|----------------|-----------------|-----------------|----------------|----------------|-----------------|
|          | A              | C              | G              | T               | A               | C              | G              | T               |
| -10      | 0.297100624739 | 0.195207984525 | 0.215521492005 | 0.29215906197   | 0.293638279773  | 0.201812990025 | 0.214827939336 | 0.289720790867  |
| -9       | 0.292950145484 | 0.193176091939 | 0.2083150463   | 0.305547879517  | 0.293389034282  | 0.197109835986 | 0.217959763108 | 0.291541366624  |
| -8       | 0.287894796729 | 0.18256148507  | 0.225063259589 | 0.304469621851  | 0.2895855331361 | 0.191631853574 | 0.210655786559 | 0.308127028506  |
| -7       | 0.265549396663 | 0.188521703322 | 0.210287336704 | 0.335630276551  | 0.285375249923  | 0.182160524933 | 0.223860379178 | 0.308603845966  |
| -6       | 0.317939715102 | 0.16721121388  | 0.227078897035 | 0.287759337224  | 0.276971342187  | 0.177397768711 | 0.220717718645 | 0.324913170457  |
| -5       | 0.376680375169 | 0.157230557497 | 0.216854413542 | 0.249223817032  | 0.332997393759  | 0.15799996749  | 0.242380402802 | 0.266622235949  |
| -4       | 0.390210070601 | 0.140444415546 | 0.230172792146 | 0.239161884946  | 0.378062062127  | 0.148387760963 | 0.224304686357 | 0.249245490553  |
| -3       | 0.301646645752 | 0.160237758524 | 0.271016542315 | 0.267088216649  | 0.358810557172  | 0.157219720737 | 0.237866892071 | 0.24610283002   |
| -2       | 0.240586918946 | 0.217271628819 | 0.239313599593 | 0.302817015881  | 0.267207421014  | 0.203926158314 | 0.257047958083 | 0.271818462589  |
| -1       | 0.274988215023 | 0.217271628819 | 0.246140758682 | 0.25012868653   | 0.235764560542  | 0.240966205563 | 0.233689320914 | 0.289579912981  |
| 0        | 0.282156732067 | 0.264162291325 | 0.226845906685 | 0.2268835069924 | 0.287981490813  | 0.234567098512 | 0.226119843734 | 0.2513331566941 |
| 1        | 0.247706670568 | 0.250513391527 | 0.161890364494 | 0.339889573411  | 0.279913522652  | 0.262574705917 | 0.17736525843  | 0.280141094621  |
| 2        | 0.239443640718 | 0.219401052249 | 0.146632205768 | 0.394523101264  | 0.248281018872  | 0.241096246688 | 0.145597295145 | 0.365020020915  |
| 3        | 0.24278678132  | 0.24751160888  | 0.151698391283 | 0.358003218518  | 0.2506655106173 | 0.214844194477 | 0.152354015291 | 0.382131265679  |
| 4        | 0.320204598037 | 0.226146935635 | 0.169188922663 | 0.284459543664  | 0.273064690042  | 0.225047004448 | 0.161034260418 | 0.340848626712  |
| 5        | 0.316303364272 | 0.226699610418 | 0.181342349518 | 0.275654675791  | 0.325314130594  | 0.210991726133 | 0.183628905975 | 0.280059818918  |
| 6        | 0.30845213132  | 0.212774373229 | 0.191252566958 | 0.287520928494  | 0.313252816203  | 0.218274029162 | 0.183141251754 | 0.285326484501  |
| 7        | 0.293638279773 | 0.219265592744 | 0.197380754997 | 0.289715372487  | 0.306658647464  | 0.208510107988 | 0.19013096225  | 0.294694863917  |
| 8        | 0.287856868068 | 0.217683425717 | 0.202262715584 | 0.292196990632  | 0.294120515613  | 0.211750299366 | 0.196806406693 | 0.297317359948  |
| 9        | 0.284107348949 | 0.214383632157 | 0.206163949349 | 0.295345069545  | 0.292982655765  | 0.212481780696 | 0.19673596775  | 0.297794177409  |
| 10       | 0.282693151709 | 0.213148241465 | 0.212714771046 | 0.29144383578   | 0.294911599127  | 0.209929723608 | 0.199217585895 | 0.29593567299   |

The left column indicates the position of upstream (negative number) or downstream (positive number) of start/end site. The number in the main text indicates the percentage of one nucleotide at certain position. EccDNA, extrachromosomal circular DNA.
